# Supplementary material
Source: Springer Nature journal article supplement (https://www.springermedizin.de/resource/supplementary/12889_2012_4554_MOESM5_ESM.pdf/9493432)
Supplement: MOESM5 [file 9493432]

Additional file 5. Crude prevalence of risk factors for noncommunicable diseases among adults aged 18 or higher living in 48 low- and middle-income countries, by wealth, World Health Survey 2002-04

|       |                             | Current daily smokers |             |      | Low-fruit/vegetable consumers <sup>a</sup> |             |      | Physically inactive people <sup>b</sup> |             |      | Heavy episodic alcohol drinkers <sup>c</sup> |             |      |      |
|-------|-----------------------------|-----------------------|-------------|------|--------------------------------------------|-------------|------|-----------------------------------------|-------------|------|----------------------------------------------|-------------|------|------|
|       |                             | Estimate              | 95% CI      |      | Estimate                                   | 95% CI      |      | Estimate                                | 95% CI      |      | Estimate                                     | 95% CI      |      |      |
| Men   | Middle-income country group | Wealth quintile 1     | <b>33.6</b> | 31.3 | 35.8                                       | <b>79.9</b> | 77.3 | 82.4                                    | <b>9.9</b>  | 8.2  | 11.5                                         | <b>13.0</b> | 11.3 | 14.6 |
|       |                             | Wealth quintile 2     | <b>31.7</b> | 29.7 | 33.7                                       | <b>76.5</b> | 73.6 | 79.4                                    | <b>13.8</b> | 11.7 | 16.0                                         | <b>13.4</b> | 11.8 | 15.0 |
|       |                             | Wealth quintile 3     | <b>29.4</b> | 27.5 | 31.2                                       | <b>74.5</b> | 71.9 | 77.1                                    | <b>13.9</b> | 11.9 | 15.9                                         | <b>13.4</b> | 11.9 | 15.0 |
|       |                             | Wealth quintile 4     | <b>27.1</b> | 25.3 | 29.0                                       | <b>72.4</b> | 69.7 | 75.1                                    | <b>13.7</b> | 11.9 | 15.4                                         | <b>13.6</b> | 12.0 | 15.3 |
|       |                             | Wealth quintile 5     | <b>24.5</b> | 22.8 | 26.1                                       | <b>67.6</b> | 65.1 | 70.1                                    | <b>13.4</b> | 11.8 | 15.0                                         | <b>14.3</b> | 12.6 | 15.9 |
|       | Low-income country group    | Wealth quintile 1     | <b>40.2</b> | 37.6 | 42.8                                       | <b>80.0</b> | 77.3 | 82.7                                    | <b>5.5</b>  | 4.2  | 6.7                                          | <b>4.5</b>  | 3.6  | 5.5  |
|       |                             | Wealth quintile 2     | <b>35.7</b> | 33.3 | 38.2                                       | <b>77.9</b> | 75.2 | 80.6                                    | <b>4.5</b>  | 3.4  | 5.5                                          | <b>3.6</b>  | 2.9  | 4.2  |
|       |                             | Wealth quintile 3     | <b>29.6</b> | 27.0 | 32.3                                       | <b>76.2</b> | 73.5 | 78.9                                    | <b>6.2</b>  | 4.5  | 8.0                                          | <b>3.0</b>  | 2.4  | 3.5  |
|       |                             | Wealth quintile 4     | <b>24.9</b> | 22.8 | 27.0                                       | <b>71.9</b> | 69.4 | 74.4                                    | <b>6.2</b>  | 4.8  | 7.5                                          | <b>3.3</b>  | 2.7  | 3.8  |
|       |                             | Wealth quintile 5     | <b>20.3</b> | 18.3 | 22.3                                       | <b>69.7</b> | 66.8 | 72.6                                    | <b>8.8</b>  | 7.4  | 10.3                                         | <b>3.6</b>  | 2.7  | 4.4  |
| Women | Middle-income country group | Wealth quintile 1     | <b>8.9</b>  | 7.6  | 10.2                                       | <b>80.1</b> | 77.5 | 82.7                                    | <b>13.9</b> | 11.9 | 15.9                                         | <b>2.3</b>  | 1.7  | 2.9  |
|       |                             | Wealth quintile 2     | <b>8.5</b>  | 7.4  | 9.5                                        | <b>79.5</b> | 77.5 | 81.5                                    | <b>13.8</b> | 12.3 | 15.3                                         | <b>2.9</b>  | 2.3  | 3.5  |
|       |                             | Wealth quintile 3     | <b>8.8</b>  | 7.7  | 9.9                                        | <b>75.9</b> | 73.7 | 78.1                                    | <b>14.5</b> | 12.9 | 16.1                                         | <b>3.6</b>  | 2.8  | 4.4  |
|       |                             | Wealth quintile 4     | <b>8.4</b>  | 7.2  | 9.5                                        | <b>70.6</b> | 68.0 | 73.2                                    | <b>12.9</b> | 11.5 | 14.3                                         | <b>3.5</b>  | 2.8  | 4.3  |
|       |                             | Wealth quintile 5     | <b>7.8</b>  | 6.7  | 8.9                                        | <b>66.8</b> | 64.1 | 69.6                                    | <b>15.0</b> | 13.3 | 16.8                                         | <b>3.8</b>  | 3.0  | 4.5  |
|       | Low-income country group    | Wealth quintile 1     | <b>7.2</b>  | 5.4  | 9.0                                        | <b>78.9</b> | 76.2 | 81.6                                    | <b>11.5</b> | 9.8  | 13.2                                         | <b>1.3</b>  | 0.9  | 1.6  |
|       |                             | Wealth quintile 2     | <b>5.5</b>  | 4.6  | 6.5                                        | <b>78.2</b> | 75.8 | 80.6                                    | <b>13.1</b> | 11.3 | 14.9                                         | <b>1.3</b>  | 0.9  | 1.7  |
|       |                             | Wealth quintile 3     | <b>5.4</b>  | 4.2  | 6.5                                        | <b>73.0</b> | 70.4 | 75.6                                    | <b>12.6</b> | 10.9 | 14.3                                         | <b>0.9</b>  | 0.6  | 1.2  |
|       |                             | Wealth quintile 4     | <b>3.7</b>  | 2.9  | 4.5                                        | <b>72.7</b> | 70.1 | 75.4                                    | <b>14.4</b> | 12.4 | 16.4                                         | <b>0.8</b>  | 0.5  | 1.0  |
|       |                             | Wealth quintile 5     | <b>2.0</b>  | 1.4  | 2.6                                        | <b>71.3</b> | 68.8 | 73.7                                    | <b>18.9</b> | 16.7 | 21.2                                         | <b>0.7</b>  | 0.5  | 0.8  |

Abbreviations: 95% CI, 95% Confidence Interval

All numbers are in percentage

<sup>a</sup> No data were available for Mexico

<sup>b</sup> No data were available for Morocco and Latvia

<sup>c</sup> Mauritania; and Bosnia-Herzegovina, Comoros, Mauritania and Pakistan were excluded from males and females datasets, respectively
